# Supplementary material for: Investigation of a novel PROS1 splicing variant in a patient with protein S deficiency
Source: PubMed Central journal article supplement (PMC11282053; doi:10.1038/s41439-024-00286-9), 2024-07-26
Supplement: 41439_2024_286_MOESM2_ESM.pdf [file 41439_2024_286_MOESM2_ESM.pdf]

**Supplementary Table 1. *PROS1* PCR Primers**

## Long-range PCR primers for DNA

| Primer set       | Primer Name | Primer sequence                   | Primer position (NC_000003.12 Homo sapiens chromosome 3, GRCh38.p14) | Product size (bp) |
|------------------|-------------|-----------------------------------|----------------------------------------------------------------------|-------------------|
| PROS1_DNA_Long_A | PROS1_L_A-F | 5'-TCAGTACTCCACTAAGGGGGATGAAGC-3' | 93983348_93983322                                                    | 19,956            |
|                  | PROS1_L_A-R | 5'-CACAGGTTGGTCACTCTCTTGACTTCC-3' | 93963393_93963419                                                    |                   |
| PROS1_DNA_Long_B | PROS1_L_B-F | 5'-AGAGTTGGGCAGGGCCAGAAAAGC-3'    | 93923177_93923200                                                    | 9,955             |
|                  | PROS1_L_B-R | 5'-GGCCAACCCAAGTGCTAGCCAAAGA-3'   | 93933131_93933107                                                    |                   |
| PROS1_DNA_Long_C | PROS1_L_C-F | 5'-CCCCTGCAAACCTGCTCCGCCA-3'      | 93896616_93896636                                                    | 15,875            |
|                  | PROS1_L_C-R | 5'-AATGACCTCCTTCCTCCACCCTGCC-3'   | 93912490_93912466                                                    |                   |
| PROS1_DNA_Long_D | PROS1_L_D-F | 5'-AACCAGGGATTGCCACCAGCACG-3'     | 93877690_93877712                                                    | 21,930            |
|                  | PROS1_L_D-R | 5'-CAGCCCCCGCAACACATTTCTCCTT-3'   | 93899619_93899595                                                    |                   |
| PROS1_DNA_Long_E | PROS1_L_E-F | 5'-TGAGGGCTTGTGATAGTATGAGCTTGC-3' | 93885106_93885080                                                    | 20,386            |
|                  | PROS1_L_E-R | 5'-CAGAGCTCACTGTAGCAGACATGAACG-3' | 93864721_93864747                                                    |                   |

## Long-range PCR primers for RNA

| Primer set     | Primer Name | Primer sequence              | Primer position (XM_054347264.1 Homo sapiens protein S (PROS1), transcript variant X1, mRNA) | Product size (bp) |
|----------------|-------------|------------------------------|----------------------------------------------------------------------------------------------|-------------------|
| PROS1_RNA_Long | PROS1_LR-F  | 5'-GTCTCAGCAGTGTTTACTAGGC-3' | 499_520                                                                                      | 2,862             |
|                | PROS1_LR-R  | 5'-CCATCTTCTGCCTTCATCAG-3'   | 3360_3339                                                                                    |                   |

## Exon 4 specific primers

| Primer set         | Primer Name | Primer sequence              | Primer position (NC_000003.12 Homo sapiens chromosome 3, GRCh38.p14) | Product size (bp) |
|--------------------|-------------|------------------------------|----------------------------------------------------------------------|-------------------|
| PROS1_Ex4_specific | PROS1_Ex4_F | 5'-TACCTCTTGGGACAGTTCCTAC-3' | 93910789_93910768                                                    | 310               |
|                    | PROS1_Ex4_R | 5'-TGAAAATACTTCCTTGCTGGGC-3' | 93910480_93910501                                                    |                   |
